# Supplementary material for: DNA methylation markers have universal prognostic value for anal cancer risk in HIV‐negative and HIV‐positive individuals
Source: PubMed Central journal article supplement (PMC8564631; doi:10.1002/1878-0261.12926), 2021-03-16
Supplement: MOL2-15-3024-s001.pdf [file MOL2-15-3024-s001.pdf]

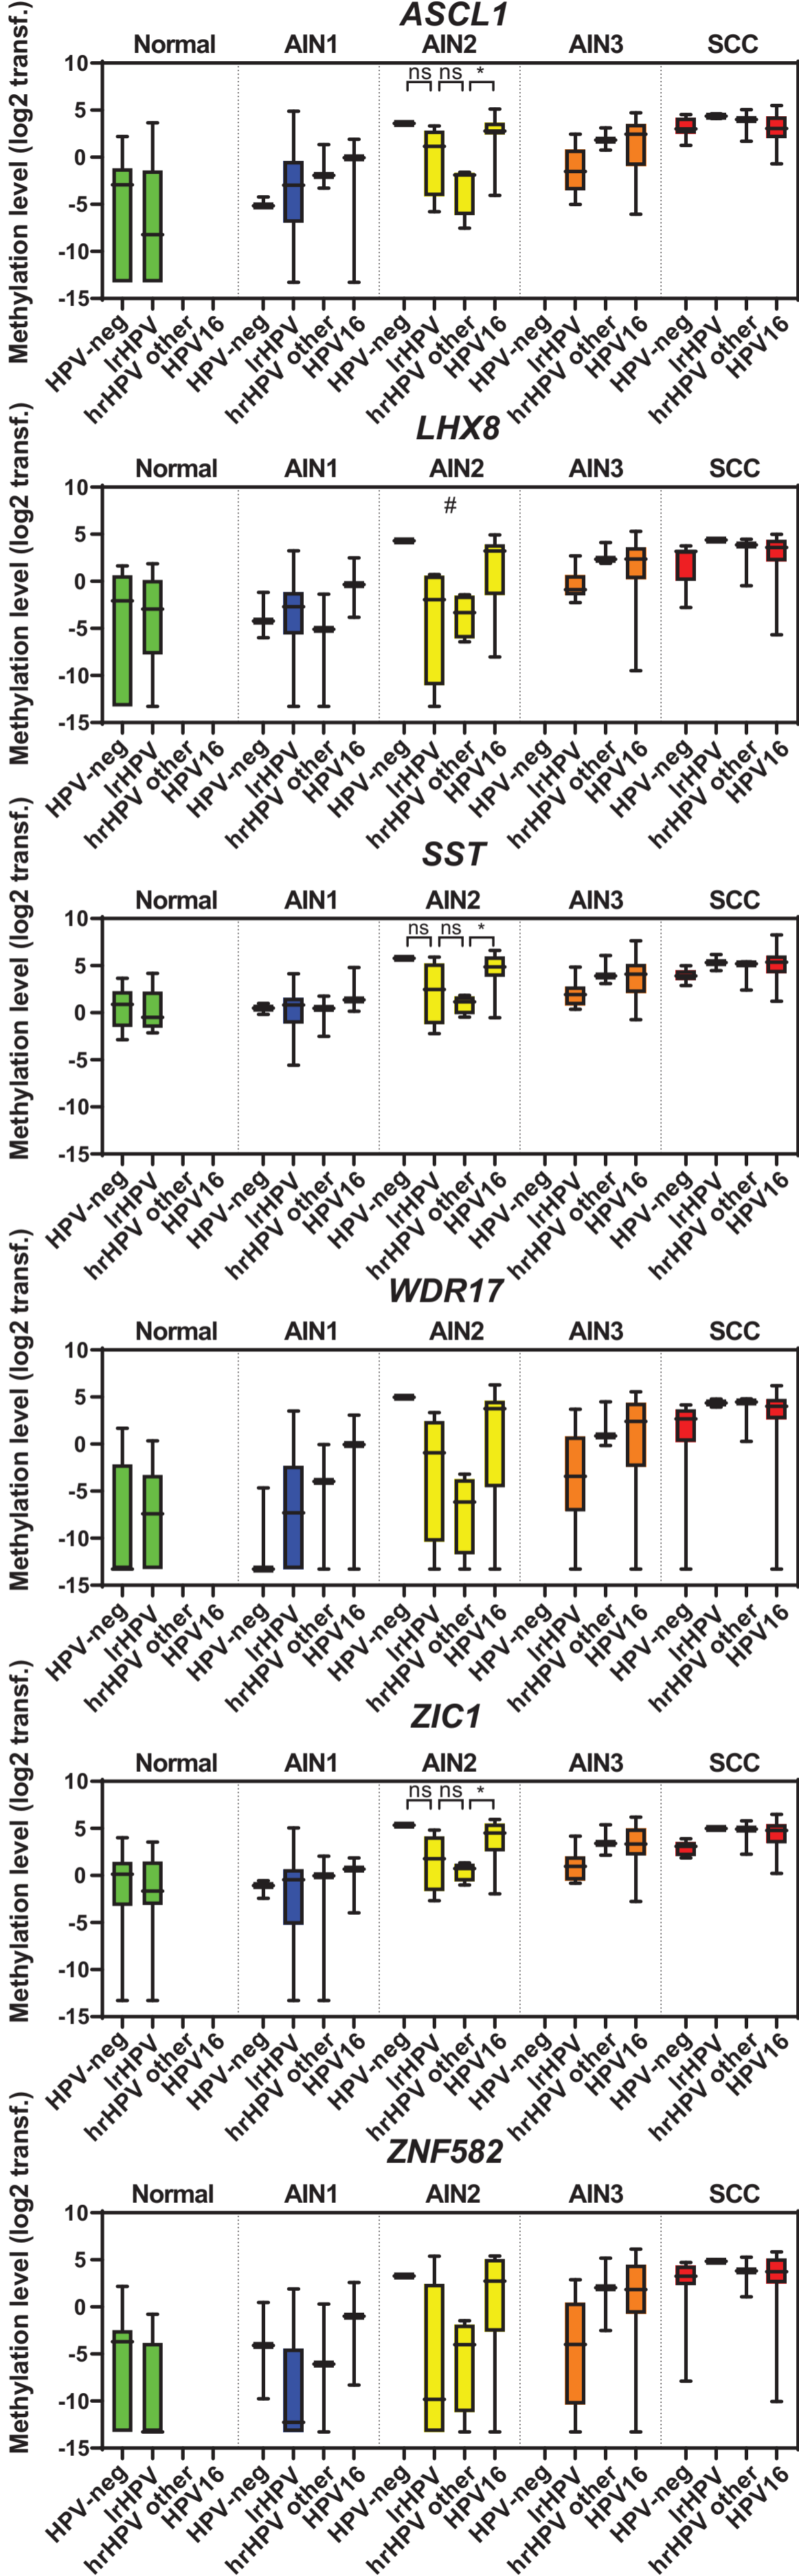

**Supplementary figure 1 (Fig. S1)**  
**Methylation levels in relation to HPV status.** Boxplots of DNA methylation levels relative to a reference gene *ACTB* (log2-transformed  $\Delta\Delta Cq$  ratios; y-axis) in relation to HPV status in the different histological categories of anal tissue samples of HIV-negative women and men combined (x-axis) for six markers: *ASCL1*, *LHX8*, *SST*, *WDR17*, *ZIC1* and *ZNF582*. HPV status: positive for  $\geq 1$  HPV type in the WTS belonging to hierarchical (from low to high) risk classes (HPV-negative, lrHPV-positive, hrHPV other (non-HPV16 hrHPV-positive), HPV16-positive).[29, 30] The box of the boxplots bounds the interquartile range (IQR) divided by the median and Tukey-style whiskers extend to a maximum of 1.5 IQR beyond the box. Differences between HPV status groups per histological categories are only visualised upon a significant Kruskal-Wallis omnibus test result and followed by *post hoc* testing using the Mann-Whitney *U*-test and Bonferroni multiple testing correction: \*  $P < 0.05$ , ns: nonsignificant. #  $P < 0.05$  on Kruskal-Wallis test but individual comparison using pairwise Mann-Whitney *U*-tests with Bonferroni correction were nonsignificant. Normal, normal control samples; AIN, anal intraepithelial neoplasia (grades 1-3); HPV, human papillomavirus; HPV-neg, HPV-negative; hrHPV, high-risk HPV; lrHPV, low-risk HPV; SCC, squamous cell carcinoma; transf., transformed; WTS, whole tissue section.

|        | HPV-neg | lrHPV | hrHPV other | HPV 16 |
|--------|---------|-------|-------------|--------|
| Normal | 17      | 13    | 0           | 0      |
| AIN1   | 3       | 48    | 3           | 3      |
| AIN2   | 1       | 4     | 4           | 12     |
| AIN3   | 0       | 6     | 3           | 19     |
| SCC    | 7       | 2     | 3           | 28     |
