# Supplementary material for: DNA methylation markers have universal prognostic value for anal cancer risk in HIV‐negative and HIV‐positive individuals
Source: PubMed Central journal article supplement (PMC8564631; doi:10.1002/1878-0261.12926), 2021-03-16
Supplement: MOL2-15-3024-s002.pdf [file MOL2-15-3024-s002.pdf]

Supplementary table 1. Number of included tissue samples of HIV-negative men (A) en HIV-negative women (B), including age at biopsy, anatomical location, HIV status, and risk factors per histological category

**A.**

**HIV-negative men**

| Histological category | Subtotal  | Age at biopsy, years | Anatomical location |           |              | Risk factors |              |           |          |                            |          |                              |
|-----------------------|-----------|----------------------|---------------------|-----------|--------------|--------------|--------------|-----------|----------|----------------------------|----------|------------------------------|
|                       |           |                      | Anal canal          | Peri-anal | Not provided | HIV          |              | MSM       | SOTR     | Other systemic immunosupp. | IBD      | Not reported/ no risk factor |
|                       |           |                      |                     |           |              | neg          | presumed neg |           |          |                            |          |                              |
| Normal                | 15        | 53 [46-69]           | 12                  | 3         | 0            | 15           | 0            | 10        | 0        | 2                          | 0        | 3                            |
| AIN1                  | 38        | 44.5 [29-54]         | 36                  | 2         | 0            | 38           | 0            | 22        | 2        | 3                          | 0        | 11                           |
| AIN2                  | 11        | 52 [45-60]           | 10                  | 1         | 0            | 11           | 0            | 8         | 0        | 1                          | 0        | 2                            |
| AIN3                  | 9         | 63 [52-68]           | 8                   | 1         | 0            | 9            | 0            | 5         | 0        | 1                          | 0        | 3                            |
| SCC                   | 18        | 56.5 [51-65]         | 5                   | 10        | 3            | 18           | 0            | 1         | 2        | 1                          | 1        | 13                           |
| <b>Total</b>          | <b>91</b> | <b>52 [41-62]</b>    | <b>71</b>           | <b>17</b> | <b>3</b>     | <b>91</b>    | <b>0</b>     | <b>46</b> | <b>4</b> | <b>8</b>                   | <b>1</b> | <b>32</b>                    |

**B.**

**HIV-negative women**

| Histological category | Subtotal  | Age at biopsy, years | Anatomical location |           |              | Risk factors |              |                        |                      |                                |          |                                       |                            |                                                     |          |                              |                              |           |
|-----------------------|-----------|----------------------|---------------------|-----------|--------------|--------------|--------------|------------------------|----------------------|--------------------------------|----------|---------------------------------------|----------------------------|-----------------------------------------------------|----------|------------------------------|------------------------------|-----------|
|                       |           |                      | Anal canal          | Peri-anal | Not provided | HIV          |              | cervical (pre-) cancer | vulvar (pre-) cancer | vulvar + cervical (pre-)cancer | SOTR     | SOTR + cervical/ vulvar (pre-) cancer | Other systemic immunosupp. | cervical (pre-) cancer + other systemic immunosupp. | IBD      | IBD + cervical (pre-) cancer | Not reported/ no risk factor |           |
|                       |           |                      |                     |           |              | neg          | presumed neg |                        |                      |                                |          |                                       |                            |                                                     |          |                              |                              |           |
| Normal                | 15        | 61 [46-67]           | 12                  | 3         | 0            | 15           | 0            | 4                      | 2                    | 2                              | 0        | 0                                     | 0                          | 0                                                   | 1        | 1                            | 1                            | 4         |
| AIN1                  | 19        | 49 [41-57]           | 16                  | 3         | 0            | 19           | 0            | 4                      | 1                    | 4                              | 0        | 2                                     | 2                          | 0                                                   | 1        | 1                            | 1                            | 4         |
| AIN2                  | 10        | 44 [39-58]           | 5                   | 5         | 0            | 10           | 0            | 2                      | 3                    | 2                              | 0        | 1                                     | 1                          | 0                                                   | 0        | 0                            | 0                            | 1         |
| AIN3                  | 19        | 52 [4-62]            | 9                   | 10        | 0            | 19           | 0            | 2                      | 6                    | 4                              | 0        | 2                                     | 0                          | 1                                                   | 1        | 0                            | 0                            | 3         |
| SCC                   | 22        | 58.5 [44-77]         | 7                   | 12        | 3            | 4            | 18           | 0                      | 3                    | 2                              | 0        | 0                                     | 0                          | 0                                                   | 1        | 0                            | 0                            | 16        |
| <b>Total</b>          | <b>85</b> | <b>52 [44-65]</b>    | <b>49</b>           | <b>33</b> | <b>3</b>     | <b>67</b>    | <b>18</b>    | <b>12</b>              | <b>15</b>            | <b>14</b>                      | <b>0</b> | <b>5</b>                              | <b>3</b>                   | <b>2</b>                                            | <b>4</b> | <b>2</b>                     | <b>2</b>                     | <b>28</b> |

Data are n, numbers or median [IQR]. Numbers represent samples. Consequently, patients with multiple sample can be represented in multiple categories. Abbreviations: Normal: normal control samples; AIN: anal intraepithelial neoplasia (grades 1-3); HIV-neg: HIV-negative; IBD: Inflammatory Bowel Disease (Crohn's disease or ulcerative colitis); immunosupp.: immunosuppressants; SCC: anal squamous cell carcinoma; SOTR: solid organ transplantation recipient.
